# Supplementary material for: Nitrogen-doped nanoporous carbon derived from waste pomelo peel as a metal-free electrocatalyst for the oxygen reduction reaction
Source: Royal Society of Chemistry journal article supplement (doi:10.1039/c6nr00764c), 2016-01-01
Supplement: c6nr00764c1.pdf [file c6nr00764c1.pdf]

## Supporting Information

### **Nitrogen-doped nanoporous carbon derived from waste pomelo peel as a metal-free electrocatalyst for the oxygen reduction reaction**

Wenjing Yuan,<sup>a</sup> Yi Feng,<sup>b</sup> Anjian Xie,<sup>a,\*</sup> Xiuzhen Zhang,<sup>a</sup> Fangzhi Huang,<sup>a</sup> Shikuo Li,<sup>a</sup>  
Xing Zhang,<sup>a</sup> Yuhua Shen,<sup>a,\*</sup>

<sup>a</sup> School of Chemistry and Chemical Engineering, Anhui University, Hefei, Anhui 230601, P. R.  
China

<sup>b</sup> School of Materials Science and Engineering, Hefei University of Technology, Hefei, Anhui  
230009, P. R. China

\*Corresponding author. Tel: +86-0551-63861475.

E-mail: anjx@ahu.edu.cn (Anjian Xie) and yhshen@ahu.edu.cn (Yuhua Shen)

## 24 Carbonization yield.

25 The carbonization yield of the product was determined by the equation (1)

$$26 \quad Y = \frac{m_1}{m_2} \times 100\% \quad (1)$$

27 Where,  $Y$  is the carbonization yield,  $m_1$  is the mass of the typical product,  $m_2$  is the mass of the  
28 pomelo peel after hydrothermal treatment and freeze-drying. According to the measurement, 0.0421  
29 g is the mass of the typical product, 0.4637 g is the mass of the pomelo peel after hydrothermal  
30 treatment and freeze-drying, respectively. The carbonization yield of the typical product calculated  
31 by the equation (1) is about 9 %.

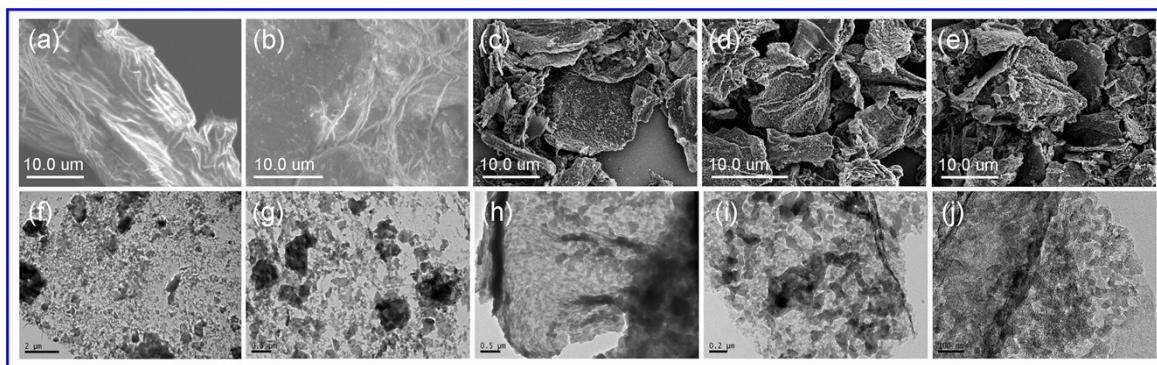

36 **Figure S1.** SEM images of (a) natural pomelo peel after freeze-drying, (b) pomelo peel after hydrothermal  
37 treatment (c) N-PC-800, (d) N-PC-900, (e) PC-1000; TEM images of (f-g) pomelo peel after hydrothermal  
38 treatment, (h) N-PC-800, (i) N-PC-900, (j) PC-1000.

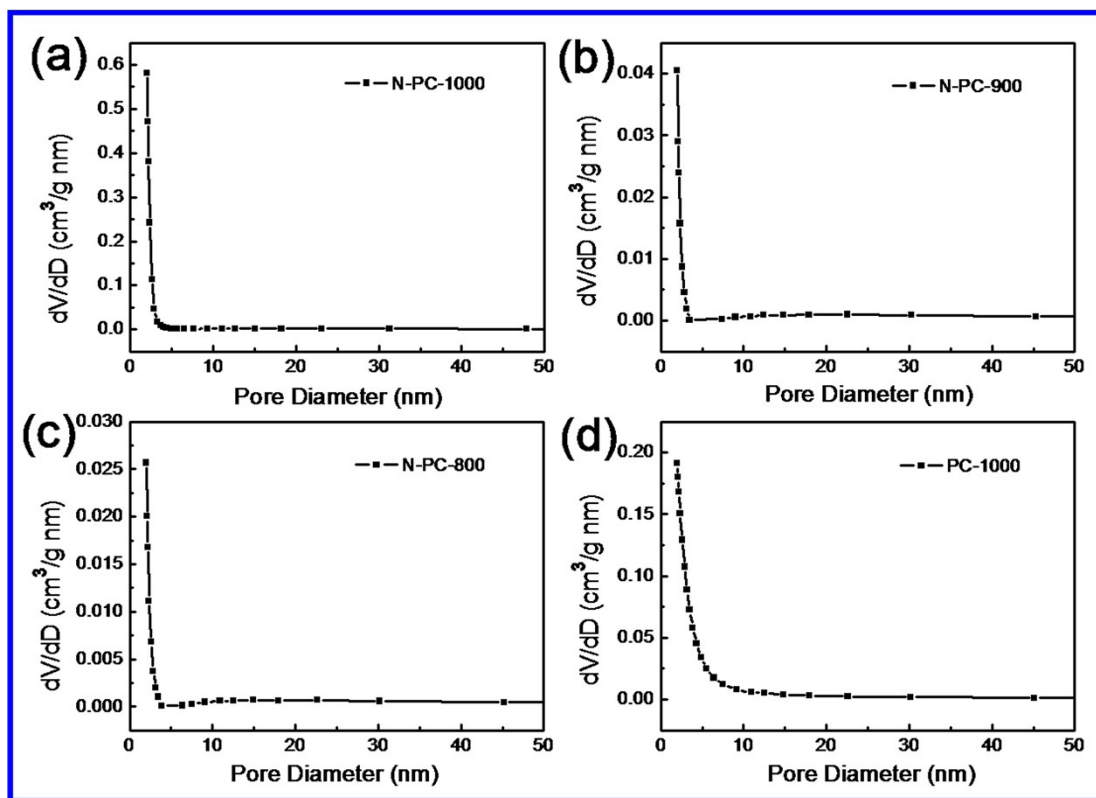

**Figure S2.** Pore diameter distribution of (a) N-PC-1000, (b) N-PC-900, (c) N-PC-800 and (d) PC-1000.
